# Supplementary material
Source: PubMed Central journal article supplement (PMC3618569)
Supplement: NIHMS439416-supplement-1.pdf [file NIHMS439416-supplement-1.pdf]

**Supplementary Table S1.** IR pathway inhibitors

| <b>Name</b>   | <b>Concentration</b>    | <b>Targets</b> | <b>Maximal Effects</b> | <b>Reference</b> |
|---------------|-------------------------|----------------|------------------------|------------------|
| IR knock down | 5.5 - 50 nM             | IR             | 5-fold increase        |                  |
| AGL2263       | 0.1 - 25 $\mu$ M        | IR/IGF-1R      | No change              | 1                |
| Rapamycin     | 0.125 - 2 $\mu$ M       | mTOR           | 50% decrease           | 2, 3             |
| LY294002      | 10 $\mu$ M              | P13K           | 20% decrease           | 4                |
| PD9859        | 10 $\mu$ M              | MEK1           | 10% decrease           | 5                |
| LY + PD       | 10 $\mu$ M + 10 $\mu$ M | P13K/MEK1      | 10% decrease           | 4, 5             |

Summary of the results of SS1P toxicity after IR knock down or addition of inhibitors in KB31 cells. The IR was knocked down for 48 hours; the inhibitors were added 1 hour before the SS1P was added. The maximal effect on the viability of cells treated with SS1P are compared to controls without SS1P treatment.
