# Supplementary material
Source: PubMed Central journal article supplement (PMC3618569)

Supplemental Fig. S1

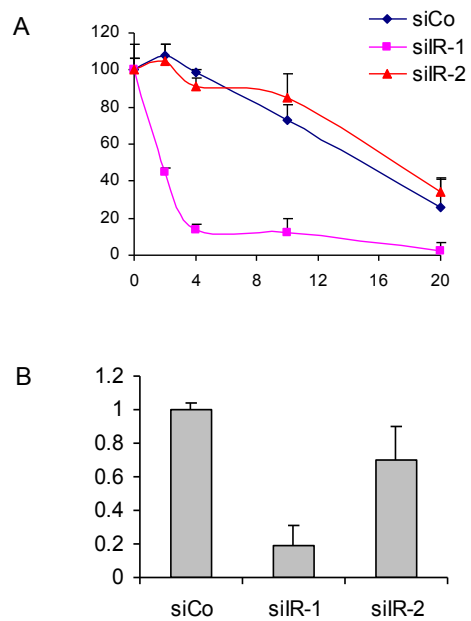

Supplemental Fig. S2

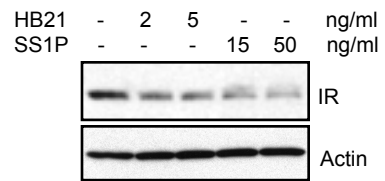

Supplemental Fig. S3

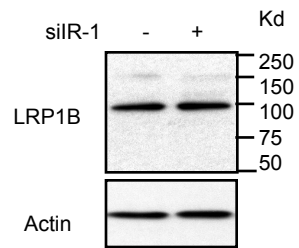

Supplemental Fig. S4

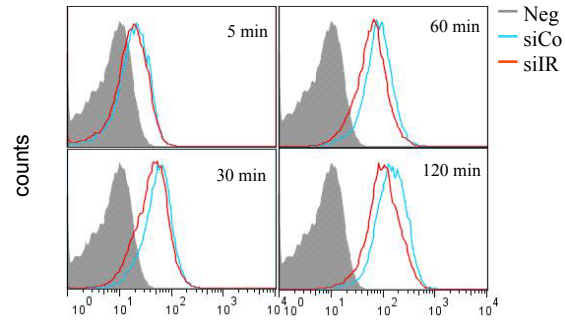

**Supplemental Fig S5**

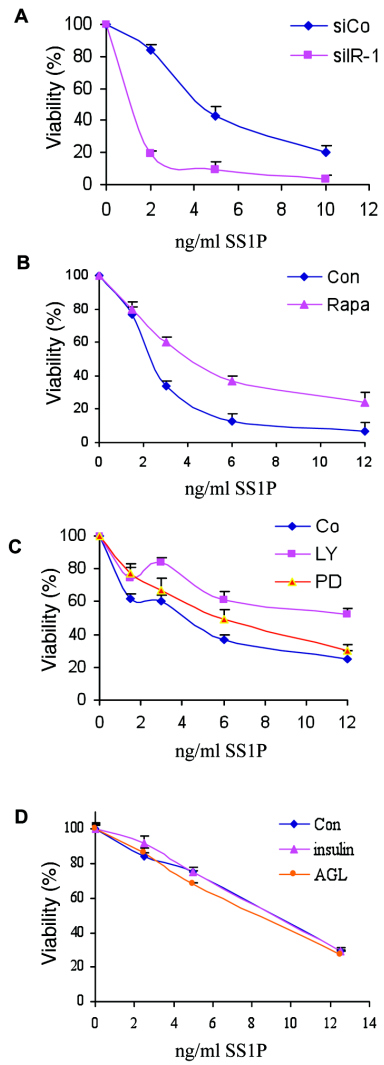

Supplemental Fig. S6

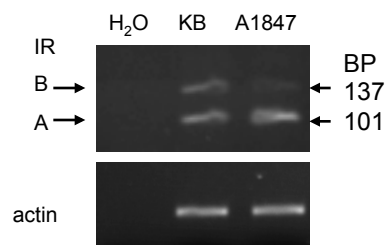

Supplement: NIHMS439416-supplement-2.pdf [file NIHMS439416-supplement-2.pdf]
